# Supplementary material for: Validation and expansion of sex determination method through analysis of human hair using electrothermal vaporization coupled to inductively coupled plasma optical emission spectrometry
Source: Royal Society of Chemistry journal article supplement (doi:10.1039/d3ja00165b), 2023-01-01
Supplement: d3ja00165b1.pdf [file d3ja00165b1.pdf]

## Supplementary Information

### Validation and Expansion of Sex Determination Method Through Analysis of Human Hair Using Electrothermal Vaporization Coupled to Inductively Coupled Plasma Optical Emission Spectrometry

Margaret MacConnachie<sup>a</sup> and Diane Beauchemin

**Fig. S1** PCA score plot using Mg, S, Sr, and Zn as predictors. Red stars: female, blue circles: male.

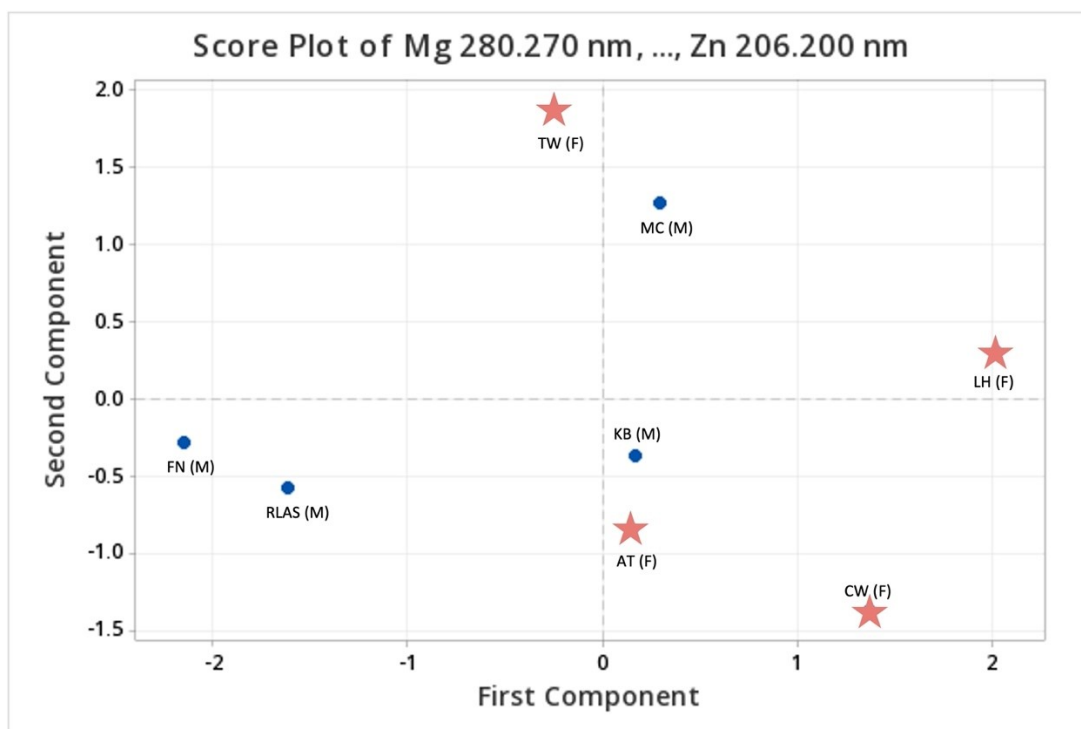

**Table S1** Predictions by LDA for the eight samples used as the statistical model with Mg, S, Sr, and Zn as predictor elements.

| Sample | Known Group | Probabilities |       | Predicted Group |
|--------|-------------|---------------|-------|-----------------|
| TW     | Female      | Male          | 0.000 | Female          |
|        |             | Female        | 1.000 |                 |
| LH     | Female      | Male          | 0.000 | Female          |
|        |             | Female        | 1.000 |                 |
| CW     | Female      | Male          | 0.000 | Female          |
|        |             | Female        | 1.000 |                 |
| AT     | Female      | Male          | 0.000 | Female          |
|        |             | Female        | 1.000 |                 |
| FN     | Male        | Male          | 1.000 | Male            |
|        |             | Female        | 0.000 |                 |
| KB     | Male        | Male          | 1.000 | Male            |
|        |             | Female        | 0.000 |                 |
| RLAS   | Male        | Male          | 1.000 | Male            |
|        |             | Female        | 1.000 |                 |
| MS     | Male        | Male          | 1.000 | Male            |
|        |             | Female        | 0.000 |                 |

**Table S2** Predictions by LDA for the 11 dyed hair samples, with undyed samples used as the statistical model with Mg, S, Sr, and Zn as predictor elements.

| Sample | Known Group | Probabilities |       | Predicted Group |
|--------|-------------|---------------|-------|-----------------|
| AM     | Female      | Male          | 0.000 | Female          |
|        |             | Female        | 1.000 |                 |
| JT     | Female      | Male          | 0.000 | Female          |
|        |             | Female        | 1.000 |                 |
| TH     | Female      | Male          | 0.000 | Female          |
|        |             | Female        | 1.000 |                 |
| SU     | Female      | Male          | 0.000 | Female          |
|        |             | Female        | 1.000 |                 |
| BS     | Female      | Male          | 0.000 | Female          |
|        |             | Female        | 1.000 |                 |
| EV     | Female      | Male          | 0.000 | Female          |
|        |             | Female        | 1.000 |                 |
| LN     | Female      | Male          | 0.000 | Female          |
|        |             | Female        | 1.000 |                 |
| MM     | Female      | Male          | 0.000 | Female          |
|        |             | Female        | 1.000 |                 |
| AN     | Male        | Male          | 0.000 | Female          |
|        |             | Female        | 1.000 |                 |
| AC     | Male        | Male          | 0.000 | Female          |
|        |             | Female        | 1.000 |                 |
| DH     | Male        | Male          | 0.000 | Female          |
|        |             | Female        | 1.000 |                 |

**Table S3** Predictions by LDA for both dyed and undyed hair samples, with dyed female samples and undyed male samples in the training set, using Mg, S, Sr, and Zn as predictor elements.

| Sample | Known Group | Dyed?  | Probabilities |       | Predicted Group |
|--------|-------------|--------|---------------|-------|-----------------|
| TW     | Female      | Undyed | Male          | 0.997 | Male            |
|        |             |        | Female        | 0.003 |                 |
| LH     | Female      | Undyed | Male          | 0.922 | Male            |
|        |             |        | Female        | 0.078 |                 |
| CW     | Female      | Undyed | Male          | 0.002 | Female          |
|        |             |        | Female        | 0.998 |                 |
| AT     | Female      | Undyed | Male          | 0.962 | Male            |
|        |             |        | Female        | 0.038 |                 |
| SPN2   | Male        | Undyed | Male          | 0.998 | Male            |
|        |             |        | Female        | 0.002 |                 |
| BS     | Female      | Dyed   | Male          | 0.075 | Female          |
|        |             |        | Female        | 0.925 |                 |
| EV     | Female      | Dyed   | Male          | 0.000 | Female          |
|        |             |        | Female        | 1.000 |                 |
| LN     | Female      | Dyed   | Male          | 0.019 | Female          |
|        |             |        | Female        | 0.981 |                 |
| MM     | Female      | Dyed   | Male          | 0.088 | Female          |
|        |             |        | Female        | 0.912 |                 |
| AN     | Male        | Dyed   | Male          | 0.028 | Female          |
|        |             |        | Female        | 0.972 |                 |
| AC     | Male        | Dyed   | Male          | 0.164 | Female          |
|        |             |        | Female        | 0.936 |                 |
| DH     | Male        | Dyed   | Male          | 0.000 | Female          |
|        |             |        | Female        | 1.000 |                 |

**Table S4** Predictions by LDA for both dyed and undyed hair samples, with only dyed samples in the training set with Mg, S, Sr, and Zn as predictor elements.

| Sample | Known Group | Dyed?  | Probabilities |       | Predicted Group |
|--------|-------------|--------|---------------|-------|-----------------|
| BS     | Female      | Dyed   | Male          | 0.000 | Female          |
|        |             |        | Female        | 1.000 |                 |
| EV     | Female      | Dyed   | Male          | 1.000 | Male            |
|        |             |        | Female        | 0.000 |                 |
| LN     | Female      | Dyed   | Male          | 0.000 | Female          |
|        |             |        | Female        | 1.000 |                 |
| MM     | Female      | Dyed   | Male          | 0.000 | Female          |
|        |             |        | Female        | 1.000 |                 |
| DH     | Male        | Dyed   | Male          | 0.000 | Female          |
|        |             |        | Female        | 1.000 |                 |
| TW     | Female      | Undyed | Male          | 0.000 | Female          |
|        |             |        | Female        | 1.000 |                 |
| LH     | Female      | Undyed | Male          | 0.000 | Female          |
|        |             |        | Female        | 1.000 |                 |
| CW     | Female      | Undyed | Male          | 0.000 | Female          |
|        |             |        | Female        | 1.000 |                 |
| AT     | Female      | Undyed | Male          | 0.000 | Female          |
|        |             |        | Female        | 1.000 |                 |
| FN     | Male        | Undyed | Male          | 0.000 | Female          |
|        |             |        | Female        | 1.000 |                 |
| KB     | Male        | Undyed | Male          | 0.000 | Female          |
|        |             |        | Female        | 1.000 |                 |
| RLAS   | Male        | Undyed | Male          | 0.000 | Female          |
|        |             |        | Female        | 1.000 |                 |
| MS     | Male        | Undyed | Male          | 0.000 | Female          |
|        |             |        | Female        | 1.000 |                 |

**Table S5** Predictions by LDA for the eight samples used as the statistical model with Cd, Ce, Fe, and Sn as predictor elements.

| Sample | Known Group | Probabilities |       | Predicted Group |
|--------|-------------|---------------|-------|-----------------|
| TW     | Female      | Male          | 0.000 | Female          |
|        |             | Female        | 1.000 |                 |
| LH     | Female      | Male          | 0.000 | Female          |
|        |             | Female        | 1.000 |                 |
| CW     | Female      | Male          | 0.000 | Female          |
|        |             | Female        | 1.000 |                 |
| AT     | Female      | Male          | 0.000 | Female          |
|        |             | Female        | 1.000 |                 |
| FN     | Male        | Male          | 1.000 | Male            |
|        |             | Female        | 0.000 |                 |
| KB     | Male        | Male          | 1.000 | Male            |
|        |             | Female        | 0.000 |                 |
| RLAS   | Male        | Male          | 1.000 | Male            |
|        |             | Female        | 0.000 |                 |
| MS     | Male        | Male          | 1.000 | Male            |
|        |             | Female        | 0.000 |                 |

**Table S6** Predictions by LDA for the 11 dyed hair samples, with undyed samples used as the statistical model with Cd, Ce, Fe, and Sn as predictor elements.

| Sample | Known Group | Probabilities |       | Predicted Group |
|--------|-------------|---------------|-------|-----------------|
| AM     | Female      | Male          | 0.000 | Female          |
|        |             | Female        | 1.000 |                 |
| JT     | Female      | Male          | 0.000 | Female          |
|        |             | Female        | 1.000 |                 |
| TH     | Female      | Male          | 0.000 | Female          |
|        |             | Female        | 1.000 |                 |
| SU     | Female      | Male          | 0.000 | Female          |
|        |             | Female        | 1.000 |                 |
| BS     | Female      | Male          | 0.000 | Female          |
|        |             | Female        | 1.000 |                 |
| EV     | Female      | Male          | 0.000 | Female          |
|        |             | Female        | 1.000 |                 |
| LN     | Female      | Male          | 0.000 | Female          |
|        |             | Female        | 1.000 |                 |
| MM     | Female      | Male          | 0.000 | Female          |
|        |             | Female        | 1.000 |                 |
| AN     | Male        | Male          | 1.000 | Male            |
|        |             | Female        | 0.000 |                 |
| AC     | Male        | Male          | 1.000 | Male            |
|        |             | Female        | 0.000 |                 |
| DH     | Male        | Male          | 1.000 | Male            |
|        |             | Female        | 0.000 |                 |

**Table S7** LDA classification of samples belonging to close family groups, both with and without the inclusion of close family members in the training set, using Cd, Ce, Fe, and Sn as predictor elements.

| Family | Sample | Known Group | Inclusion of family members in model? | Probabilities |        | Predicted Group |
|--------|--------|-------------|---------------------------------------|---------------|--------|-----------------|
| 1      | MT     | Female      | No                                    | Male          | 0.000  | Female          |
|        |        |             |                                       | Female        | 1.000  |                 |
|        | AT     | Female      | No                                    | Male          | 0.000  | Female          |
|        |        |             |                                       | Female        | 1.000  |                 |
| 2      | MT     | Female      | Yes                                   | Male          | 0.000  | Female          |
|        |        |             |                                       | Female        | 1.000  |                 |
|        | AT     | Female      | Yes                                   | Male          | 0.000  | Female          |
|        |        |             |                                       | Female        | 1.000  |                 |
| 2      | MC     | Male        | No                                    | Male          | 1.000  | Male            |
|        |        |             |                                       | Female        | 0.000  |                 |
|        | CC     | Female      | No                                    | Male          | 0.000  | Female          |
|        |        |             |                                       | Female        | 1.000  |                 |
|        | RS     | Female      | No                                    | Male          | 0.000  | Female          |
|        |        |             |                                       | Female        | 1.000  |                 |
| MC     | Male   | Yes         | Male                                  | 1.000         | Male   |                 |
|        |        |             | Female                                | 0.000         |        |                 |
| CC     | Female | Yes         | Male                                  | 0.826         | Male   |                 |
|        |        |             | Female                                | 0.174         |        |                 |
| RS     | Female | Yes         | Male                                  | 0.000         | Female |                 |
|        |        |             | Female                                | 1.000         |        |                 |
